# Supplementary material for: TP53 Mutation in Circulating exoDNA Correlates With Outcomes of Patients With Hepatocellular Carcinoma
Source: Research Square preprint supplement (doi:10.21203/rs.3.rs-124600/v1), 2020-12-15
Supplement: Supplementary file 1 [file 92e824292a2e3432773f6b8d.docx]

**Supplementary Table 2:** **Variants in TP53 detected in circulating exoDNA of HCC patients (Continued).**

| Subjects | TP53 mutation status | The ratio of MD/TD  (％) | Dilution  multiple | c.747G＞T-T(FAM) | | c.747G＞T-G(VIC) | |
| --- | --- | --- | --- | --- | --- | --- | --- |
| **Copies per 20μl well**  **(copies/μl)** | **Copies of 1μl DNA** | **Copies per 20μl well**  **(copies/μl)** | **Copies of 1μl DNA** |
| A1 | Y | 50 | stoste | 3.6 | 1.8 | 3.6 | 1.8 |
| A2 | Y | 100 | stoste | 2 | 1 | 0 | 0 |
| A3 | Y | 50 | stoste | 2 | 1 | 2 | 1 |
| A4 | Y | 50 | stoste | 1.8 | 0.9 | 1.8 | 0.9 |
| A5 | Y | 50 | stoste | 1.8 | 0.9 | 1.8 | 0.9 |
| A6 | Y | 50 | stoste | 2 | 1 | 2 | 1 |
| A7 | N | 0 | stoste | 0 | 0 | 0 | 0 |
| A8 | N | 0 | stoste | 0 | 0 | 0 | 0 |
| A9 | N | 0 | stoste | 0 | 0 | 0 | 0 |
| A10 | N | 0 | stoste | 0 | 0 | 0 | 0 |
| A11 | Y | 40 | stoste | 3.4 | 1.7 | 5.2 | 2.6 |
| A12 | Y | 100 | stoste | 42 | 21 | 42 | 21 |
| A13 | Y | 0 | stoste | 1.6 | 0.8 | 0 | 0 |
| A14 | N | 0 | stoste | 0 | 0 | 0 | 0 |
| A15 | Y | 50 | stoste | 4.6 | 2.3 | 4.6 | 2.3 |
| A16 | N | 0 | stoste | 0 | 0 | 0 | 0 |
| A17 | Y | 100 | stoste | 1.6 | 0.8 | 0 | 0 |
| A18 | Y | 50 | stoste | 2 | 1 | 2 | 1 |
| A19 | Y | 50 | stoste | 3.2 | 1.6 | 3.2 | 1.6 |
| A20 | Y | 67 | stoste | 3.2 | 1.6 | 1.6 | 0.8 |
| A21 | Y | 50 | stoste | 3.4 | 1.7 | 3.4 | 1.7 |
| A22 | Y | 75 | stoste | 4.4 | 2.2 | 1.4 | 0.7 |
| B1 | Y | 50 | stoste | 4.6 | 2.3 | 4.6 | 2.3 |
| B2 | Y | 50 | stoste | 2 | 1 | 2 | 1 |
| B3 | Y | 50 | stoste | 5 | 2.5 | 1.6 | 0.8 |
| B4 | Y | 75 | stoste | 4.6 | 2.3 | 3 | 1.5 |

**Supplementary Table 2: Variants in TP53 detected in circulating exoDNA of HCC patients (Continued).**

| Subjects | TP53 mutation status | TP53 mutation rate  (％) | Dilution  multiple | c.747G＞T-T(FAM) | | c.747G＞T-G(VIC) | |
| --- | --- | --- | --- | --- | --- | --- | --- |
| **Copies per 20μl well**  **(copies/μl)** | **Copies of 1μl DNA** | **Copies per 20μl well**  **(copies/μl)** | **Copies of 1μl DNA** |
| B5 | Y | 60 | stoste | 12.8 | 6.4 | 12.8 | 6.4 |
| B6 | Y | 50 | stoste | 5 | 2.5 | 3.4 | 1.7 |
| B7 | Y | 60 | stoste | 1.6 | 0.8 | 0 | 0 |
| B8 | Y | 100 | stoste | 8.8 | 4.4 | 5.8 | 2.9 |
| B9 | Y | 60 | stoste | 4.2 | 2.1 | 2.8 | 1.4 |
| B10 | N | 60 | stoste | 0 | 0 | 1.4 | 0.7 |
| B11 | Y | 0 | stoste | 3.6 | 1.8 | 0 | 0 |
| B12 | Y | 100 | stoste | 1.6 | 0.8 | 0 | 0 |
| B13 | Y | 100 | stoste | 8.4 | 4.2 | 10 | 5 |
| B14 | Y | 45.5 | stoste | 7.2 | 3.6 | 5.8 | 2.9 |
| B15 | Y | 55.6 | stoste | 1.8 | 0.9 | 1.8 | 0.9 |
| B16 | Y | 50 | stoste | 7.2 | 3.6 | 7.2 | 3.6 |
| B17 | Y | 50 | stoste | 7.6 | 3.8 | 4.6 | 2.3 |
| B18 | Y | 62.5 | stoste | 6 | 3 | 1.6 | 0.8 |

Abbreviations: TP53: tumor protein p53; MD/TD: mutant droplets/total droplets; exoDNA: exosomal DNA; Y: Yes; N, No.
